# Supplementary material for: Production, purification and characterization of recombinant human R-spondin1 (RSPO1) protein stably expressed in human HEK293 cells
Source: PubMed Central journal article supplement (PMC6971977; doi:10.1186/s12896-020-0600-0), 2020-01-20

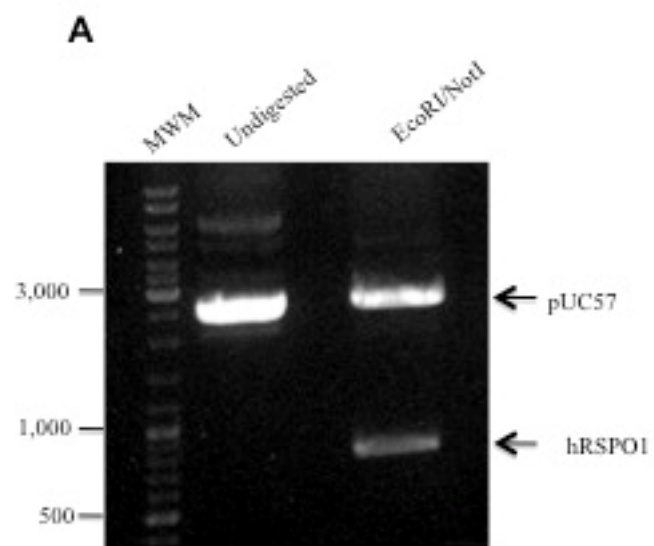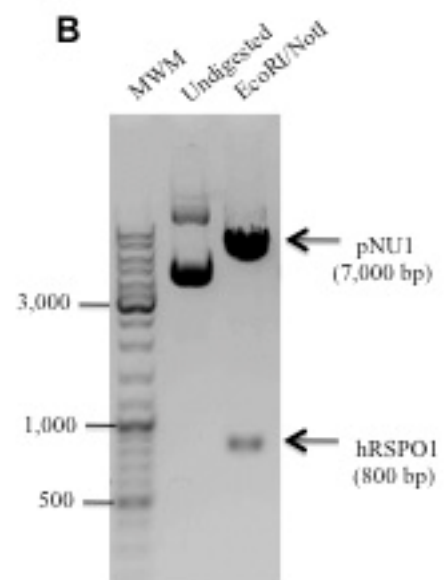

Supplement: 12896_2020_600_MOESM1_ESM.pdf [file 12896_2020_600_MOESM1_ESM.pdf]
